# Supplementary material for: Facile microwave synthesis, structural diversity and herbicidal activity of six novel alkaline-earth metal complexes (AECs) based on skeletal isomerization chlorophenoxyacetic acids
Source: Royal Society of Chemistry journal article supplement (doi:10.1039/c8nj00107c), 2018-01-01
Supplement: c8nj00107c1.pdf [file c8nj00107c1.pdf]

# Facile microwave synthesis, structural diversity and herbicidal activity of six novel alkaline-earth metal complexes (AECs) based on skeletal isomerization chlorophenoxyacetic acids

Xiuling Xu,<sup>‡</sup> Fan Hu,<sup>‡</sup> Yuwei Ma, Jinming Gao\*, and Qi Shuai\*

Shaanxi Key Laboratory of Natural Products & Chemical Biology, College of Chemistry & Pharmacy, Northwest A&F University, Yangling, Shaanxi 712100,

People's Republic of China.

E-mail: shuaiqi@nwsuaf.edu.cn; jinminggao@nwsuaf.edu.cn

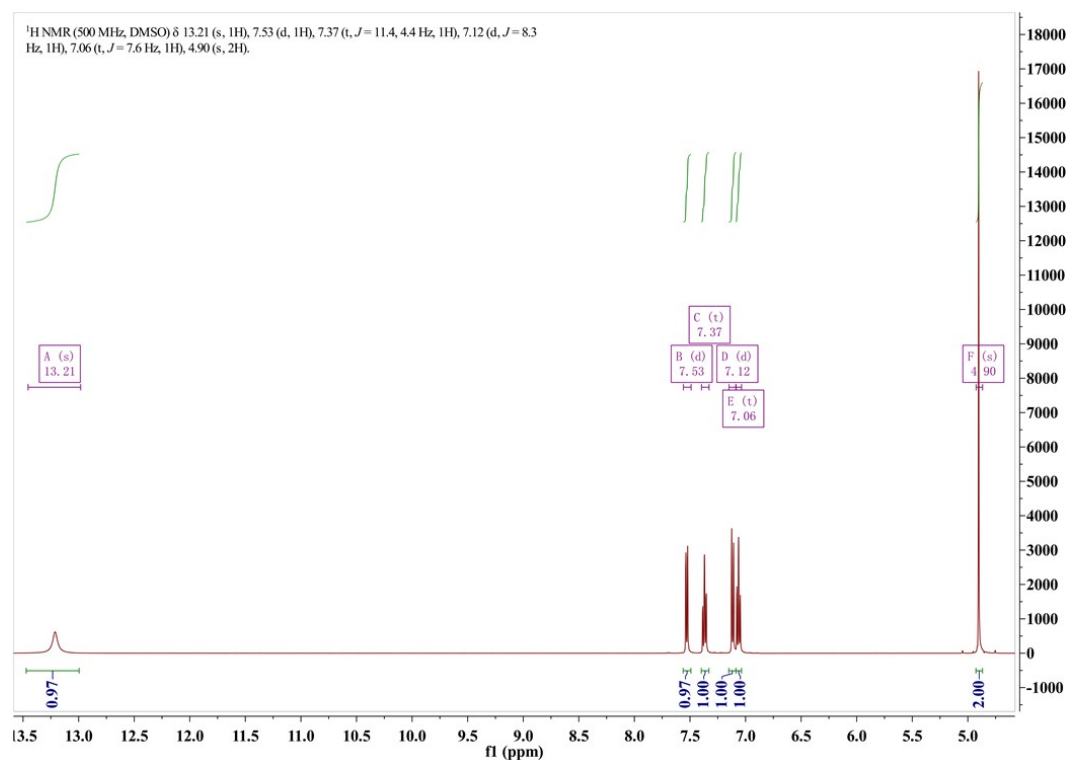

Fig. S1 <sup>1</sup>H NMR spectra of *o*-HCPA

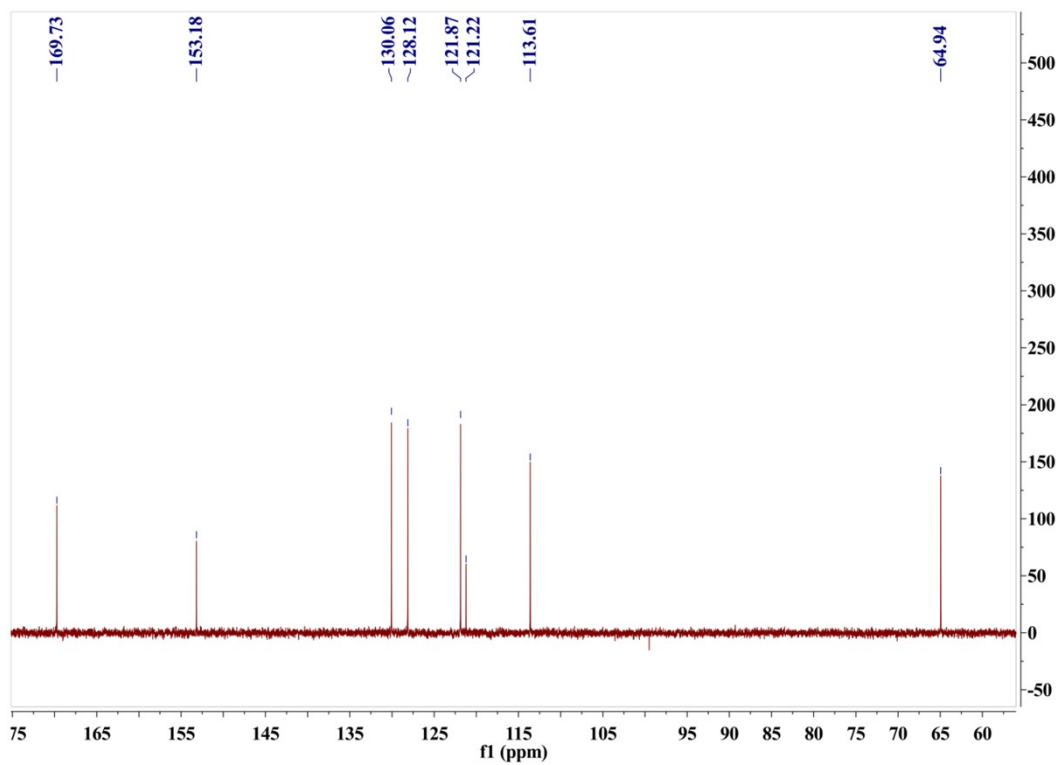

Fig. S2 <sup>1</sup>H NMR spectra of *o*-HCPA

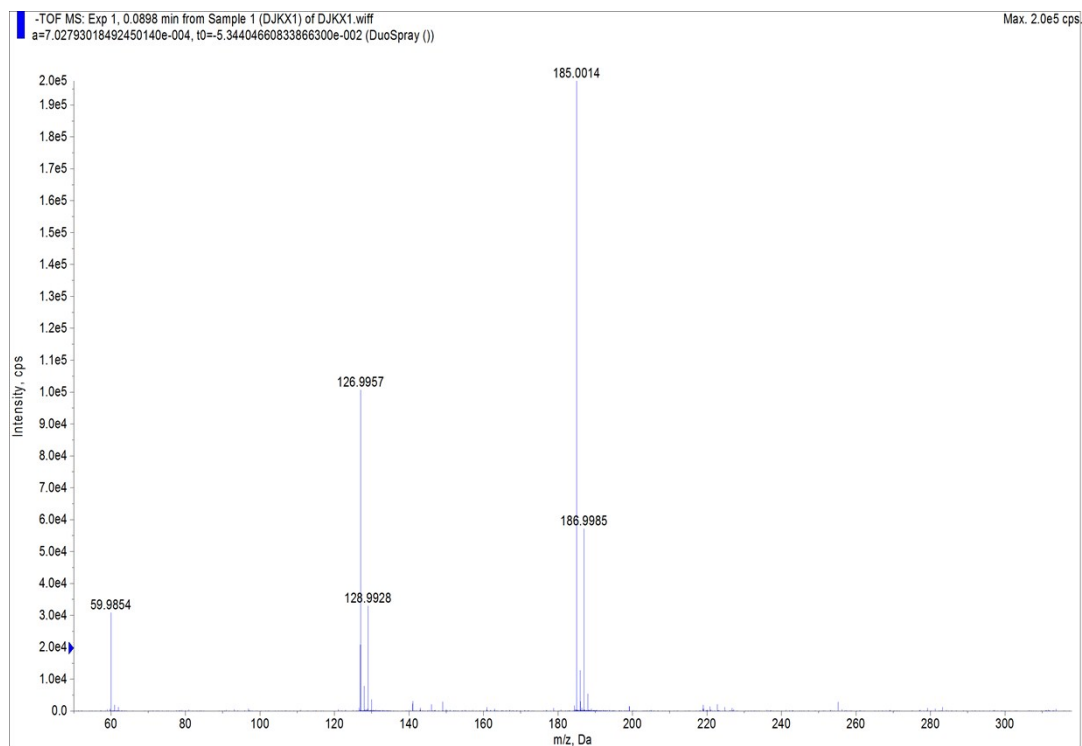

Fig. S3 HRMS spectra of compounds *o*-HCPA.

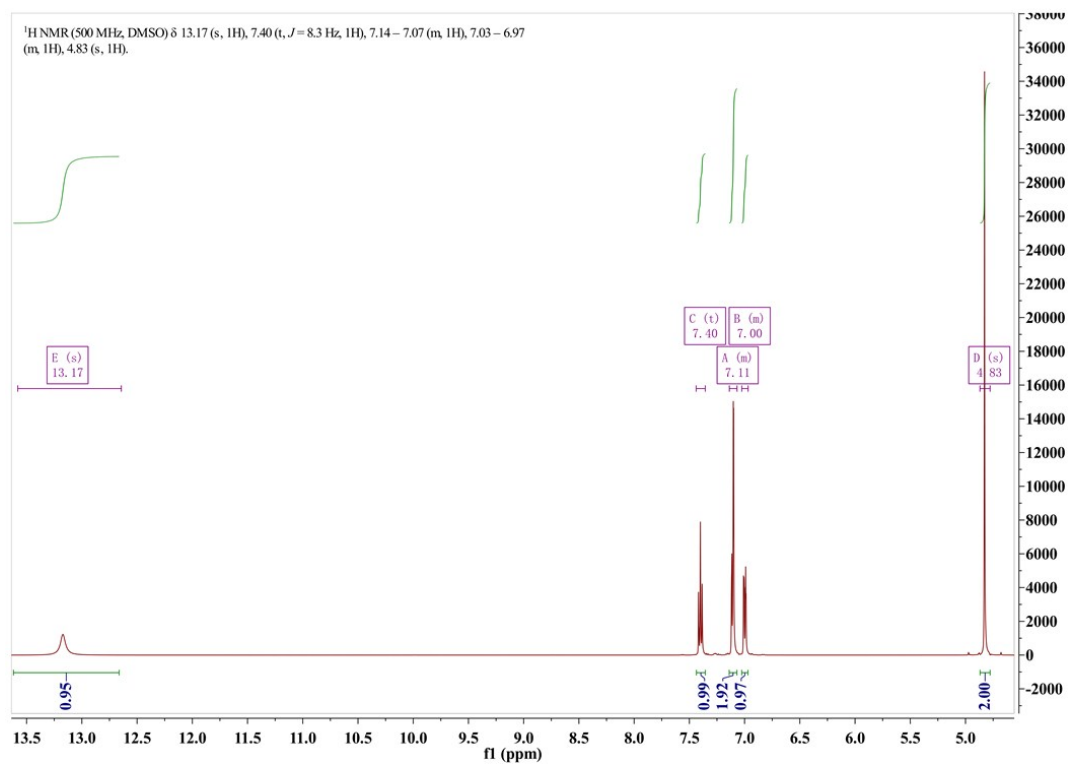

Fig. S4 <sup>1</sup>H NMR spectra of *m*-HCPA

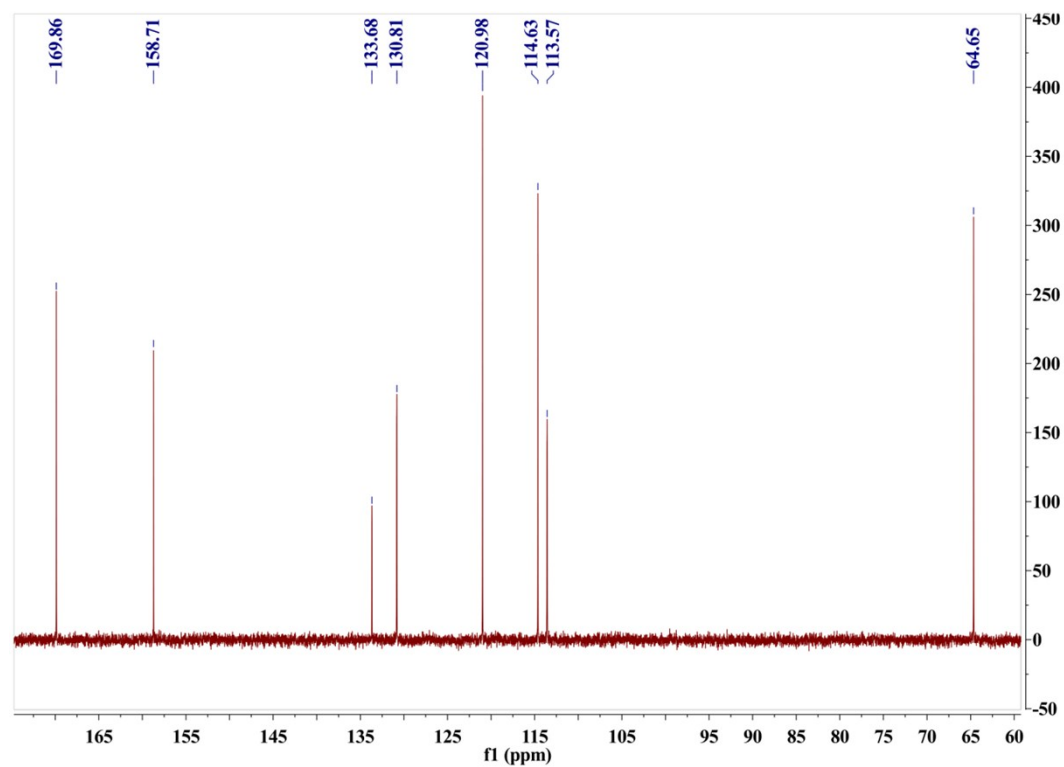

Fig. S5 <sup>13</sup>C NMR spectra of *m*-HCPA

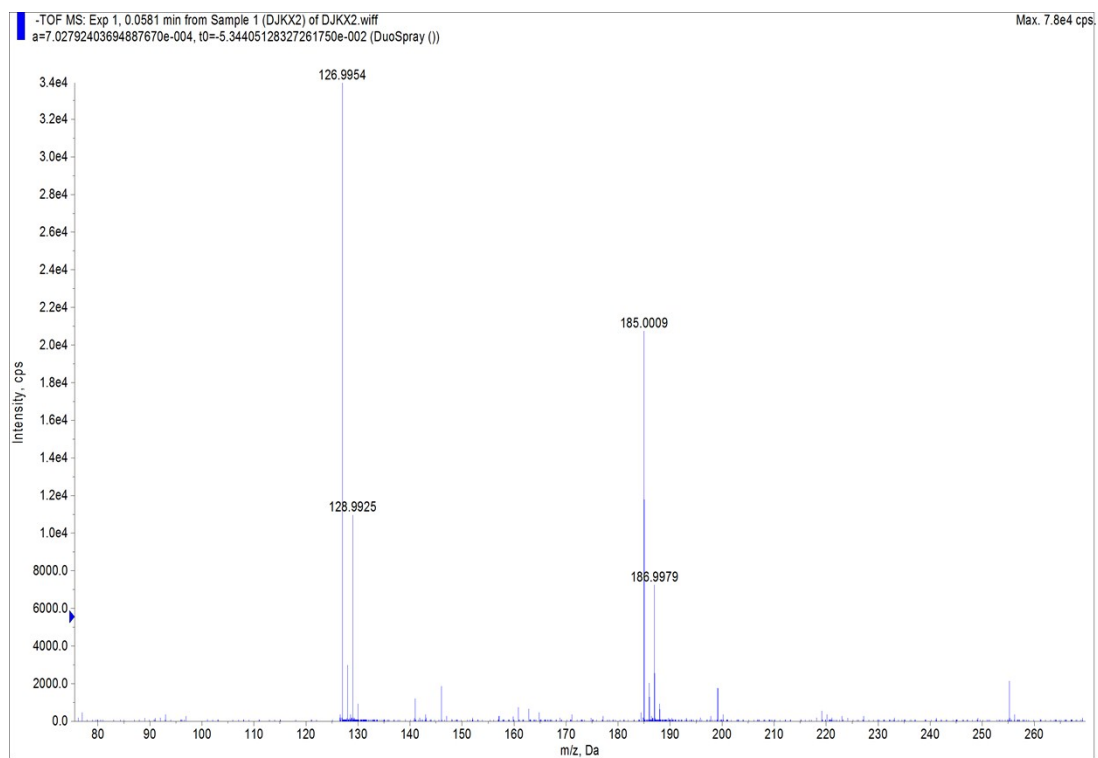

Fig. S6 HRMS spectra of compounds *m*-HCPA.

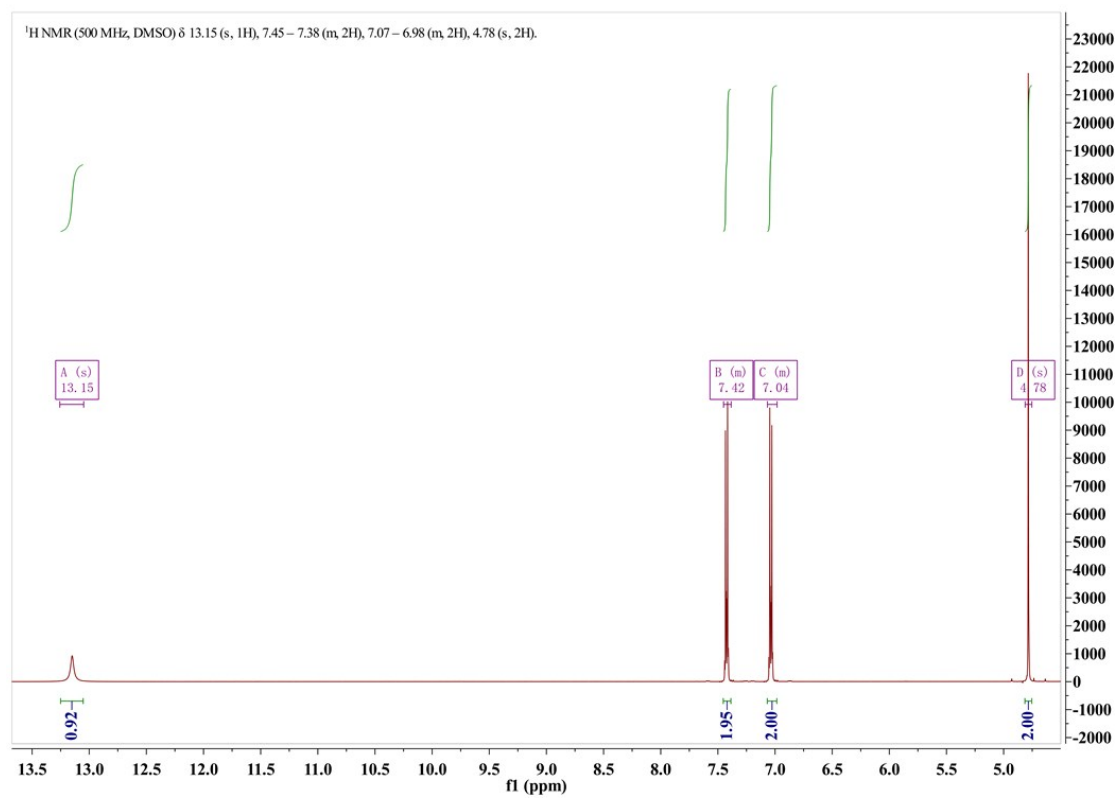

Fig. S7 <sup>1</sup>H NMR spectra of *p*-HCPA

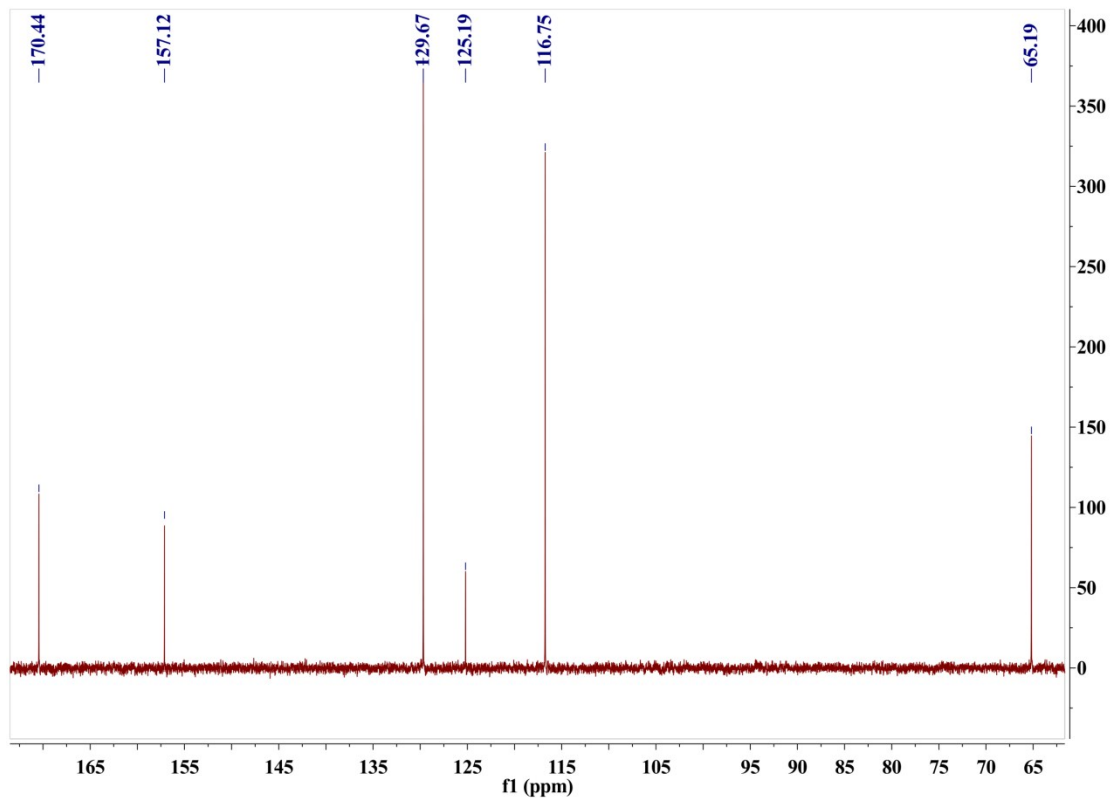

Fig. S8  $^{13}\text{C}$ NMR spectra of *p*-HCPA

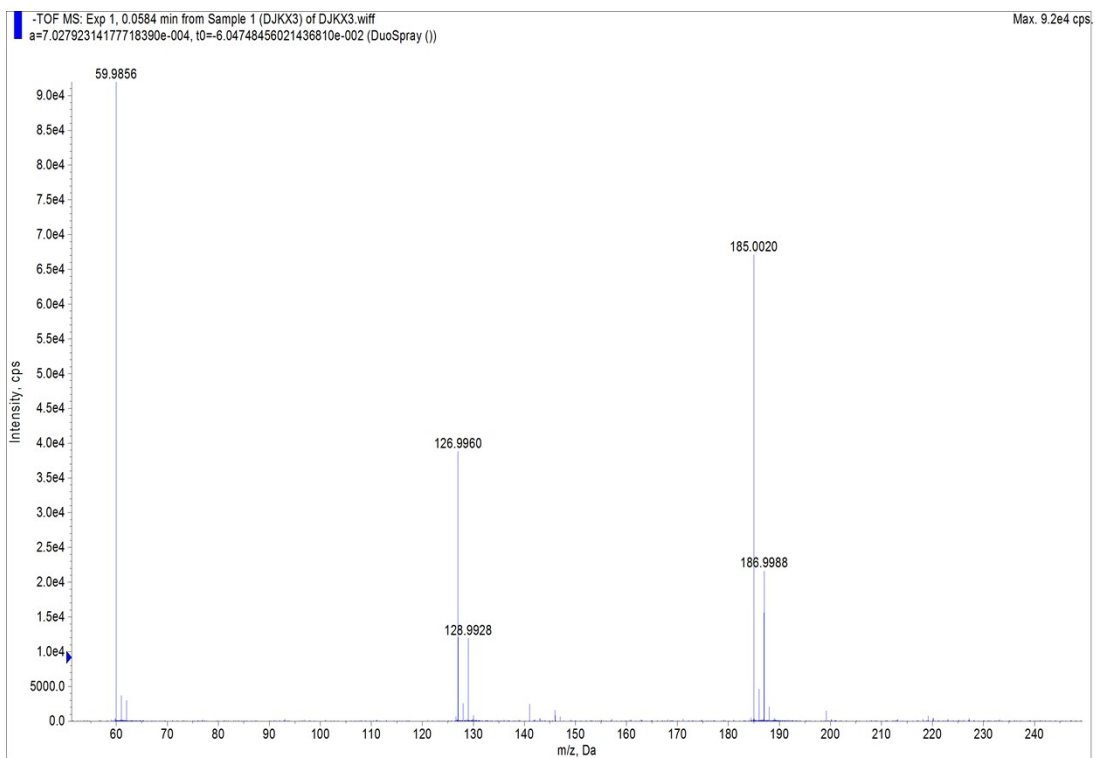

Fig. S9 HRMS spectra of compounds *p*-HCPA.

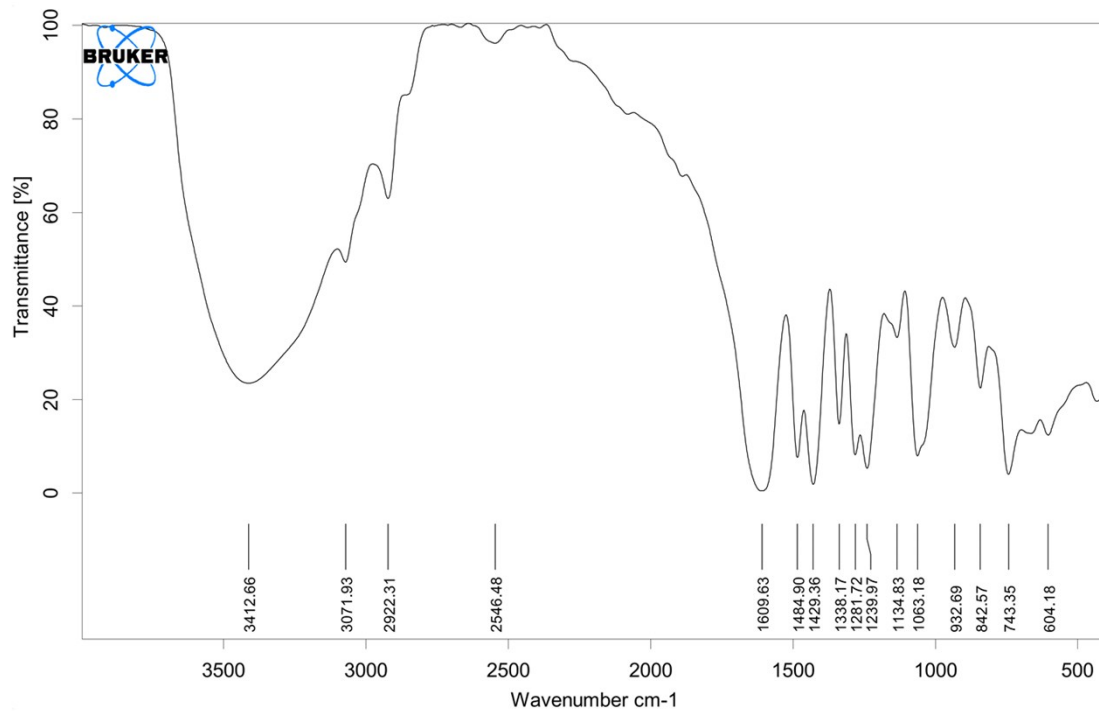

Fig. S10 IR spectra of complex 1.

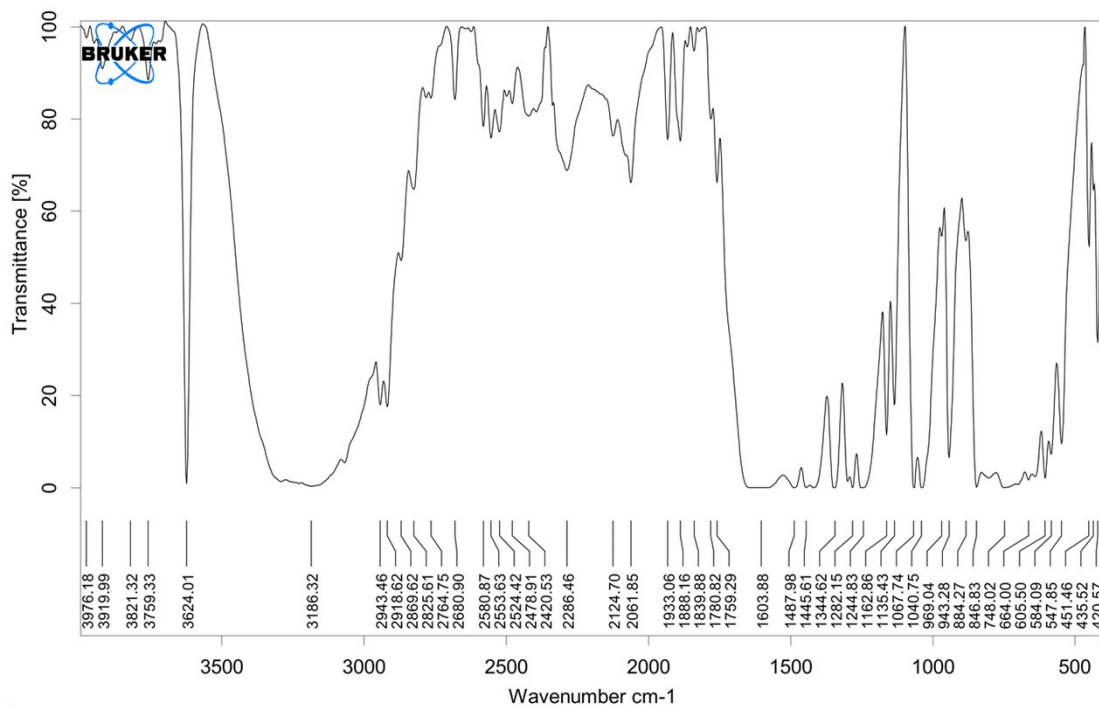

Fig. S11 IR spectra of complex 2.

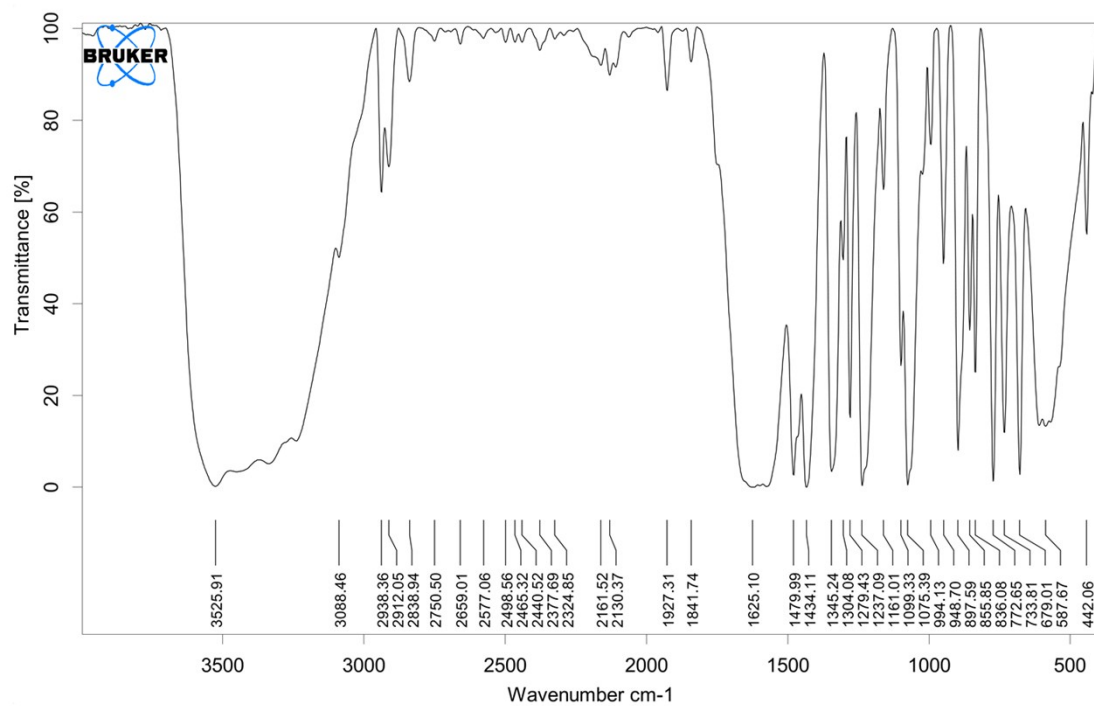

Fig. S12 IR spectra of complex 3.

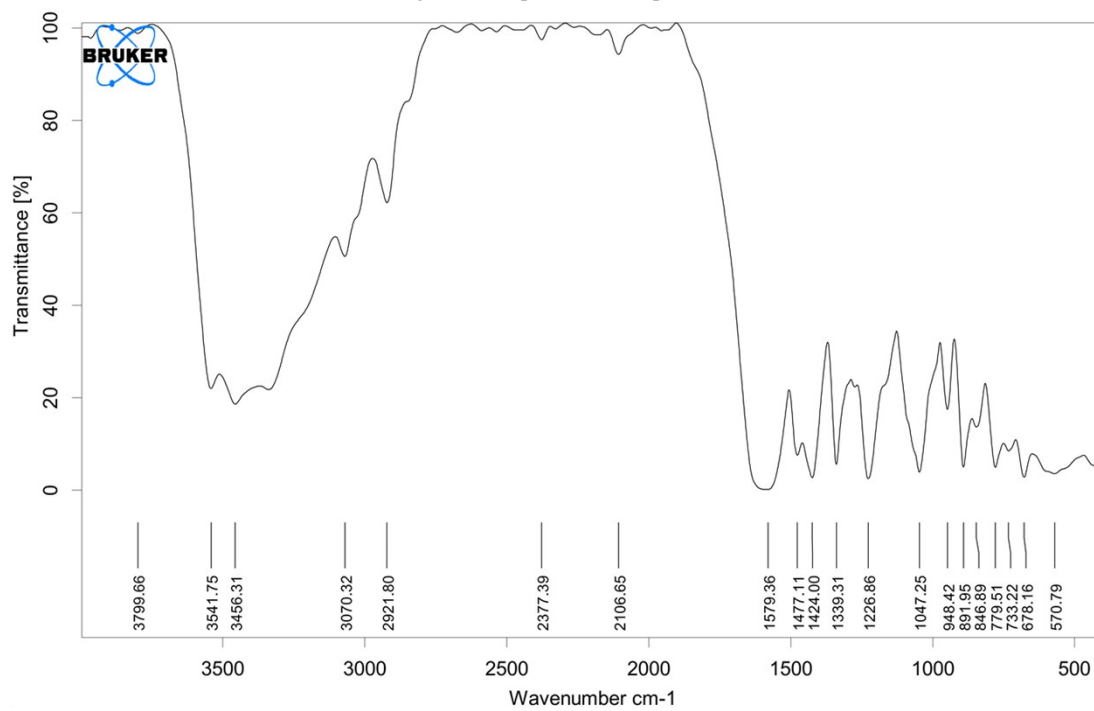

Fig. S13 IR spectra of complex 4.

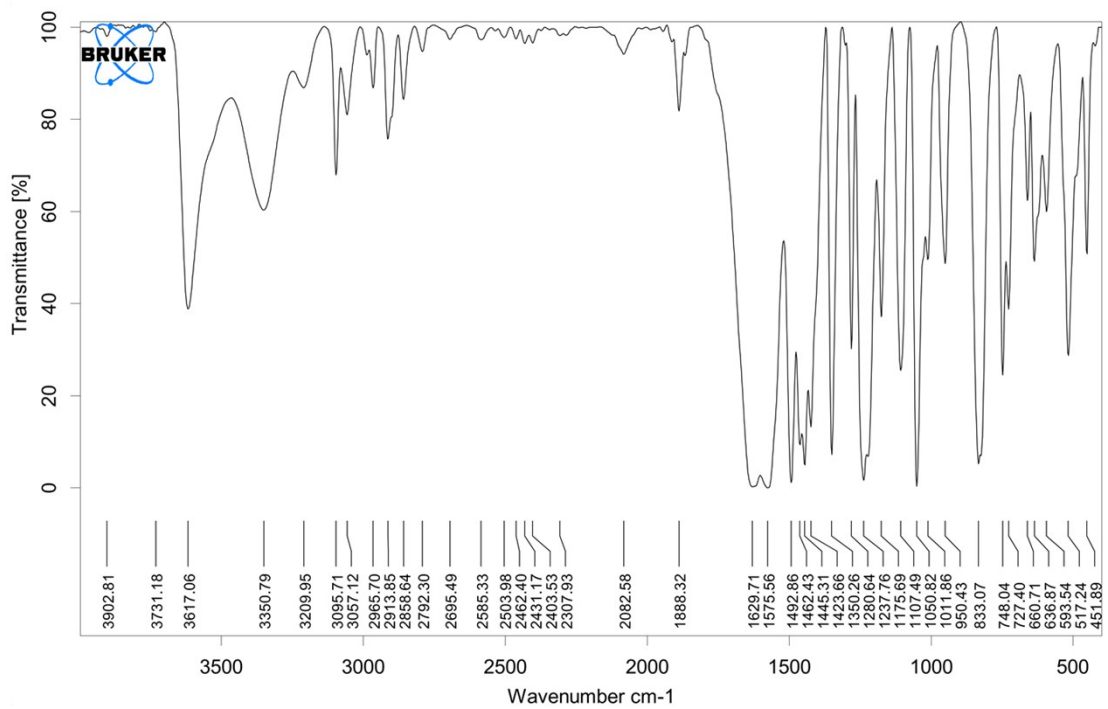

Fig. S14 IR spectra of complex 5.

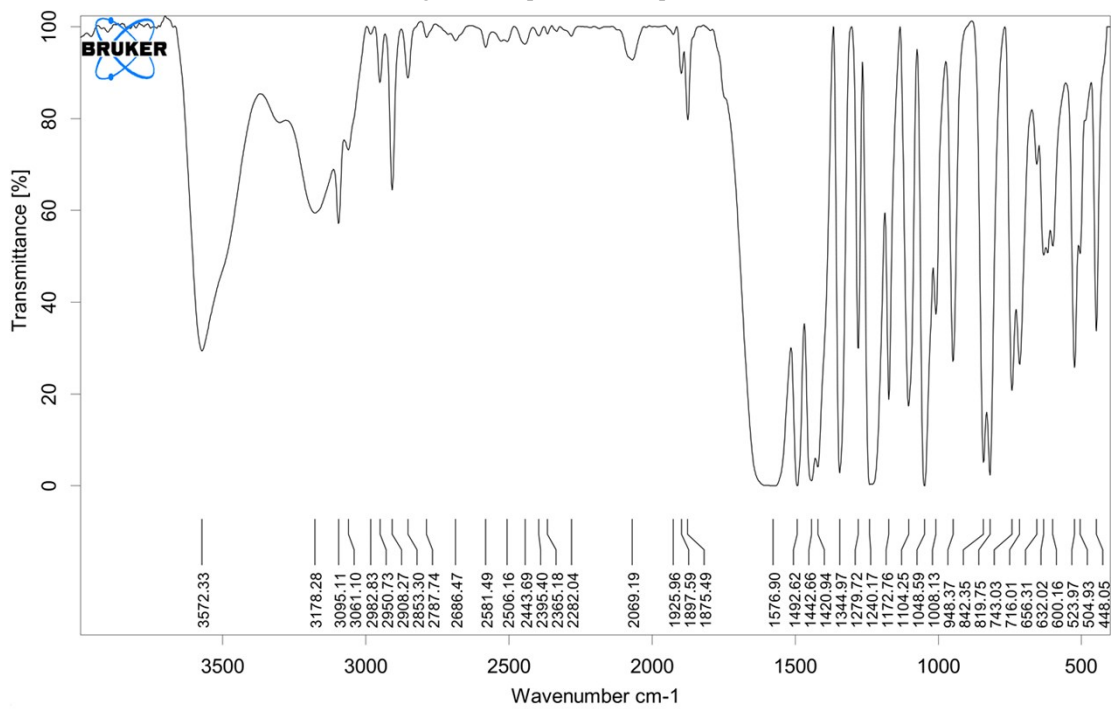

Fig. S15 IR spectra of complex 6.



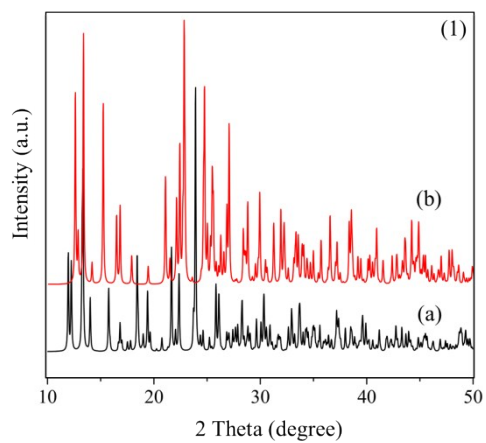

Fig. S16 The PXRD graph for complex 1 ((a) modulated by Mercury; (b) observed.)

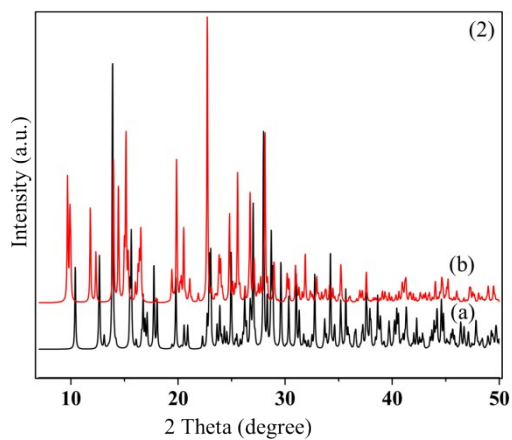

Fig. S17 The PXRD graph for complex 2 ((a) modulated by Mercury; (b) observed.)

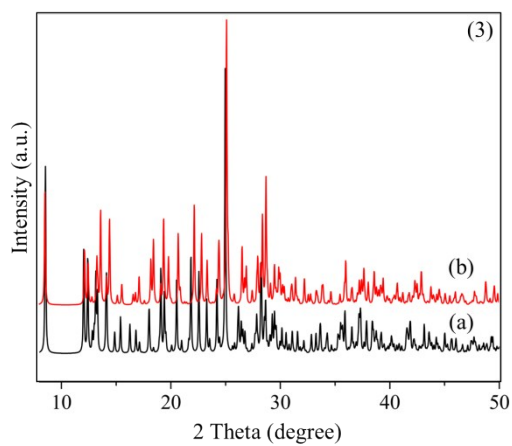

Fig. S18 The PXRD graph for complex 3 ((a) modulated by Mercury; (b) observed.)

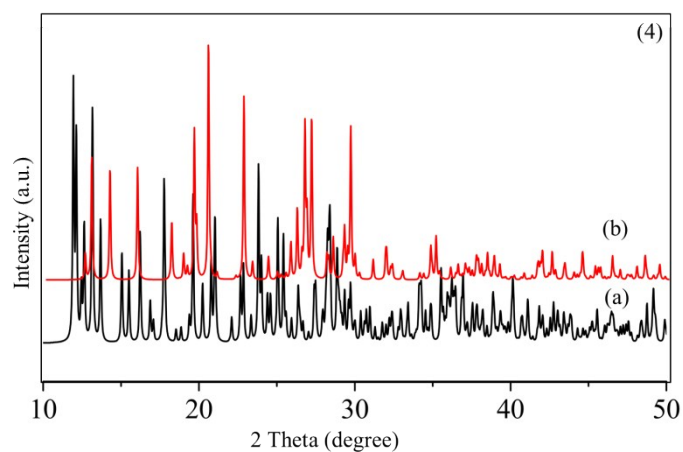

Fig. S19 The PXRD graph for complex 4 ((a) modulated by Mercury; (b) observed.)

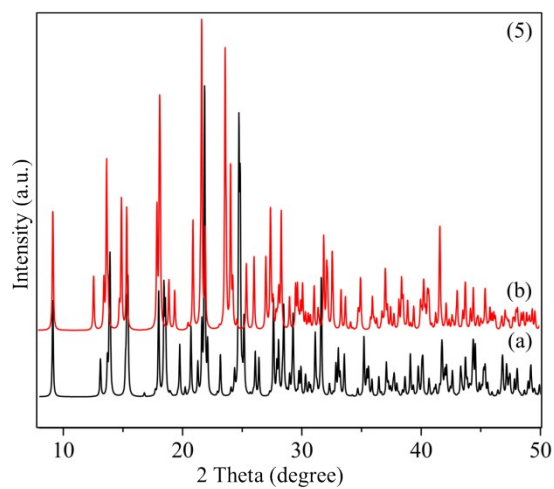

Fig. S20 The PXRD graph for complex 5 ((a) modulated by Mercury; (b) observed.)

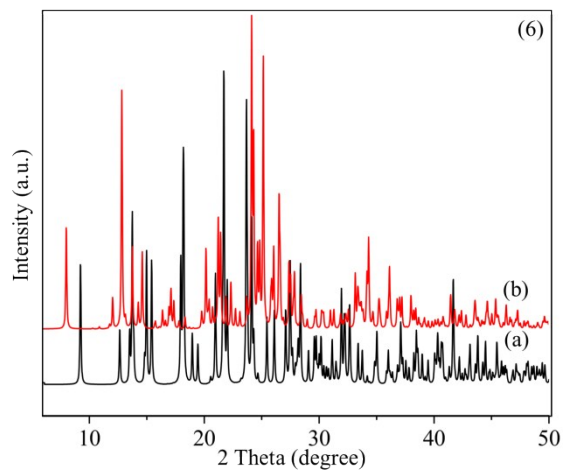

Fig. S21 The PXRD graph for complex 6 ((a) modulated by Mercury; (b) observed.)

Table S1. Selected bond lengths (Å) and angles (°) for 1-6.

| 1                  |            |                    |            |
|--------------------|------------|--------------------|------------|
| Sr(1)-O(4W)        | 2.570(6)   | Sr(1)-O(1)         | 2.685(5)   |
| Sr(1)-O(2)A        | 2.572(5)   | Sr(1)-O(2W)C       | 2.726(5)   |
| Sr(1)-O(1W)        | 2.590(6)   | Sr(1)-O(2W)        | 2.773(5)   |
| Sr(1)-O(1)B        | 2.637(5)   | Sr(1)-O(3W)B       | 2.844(5)   |
| Sr(1)-O(3W)        | 2.673(5)   |                    |            |
| O(4W)-Sr(1)-O(2)A  | 72.42(18)  | O(3W)-Sr(1)-O(1)   | 61.89(16)  |
| O(4W)-Sr(1)-O(1W)  | 88.4(2)    | O(4W)-Sr(1)-O(2W)  | 139.10(17) |
| O(2)B-Sr(1)-O(1W)  | 69.8(2)    | O(2)A-Sr(1)-O(2W)  | 66.70(16)  |
| O(4W)-Sr(1)-O(3W)  | 137.50(17) | O(1W)-Sr(1)-O(2W)  | 78.79(19)  |
| O(2)A-Sr(1)-O(3W)  | 134.48(18) | O(3W)-Sr(1)-O(2W)  | 77.21(16)  |
| O(1W)-Sr(1)-O(3W)  | 77.0(2)    | O(1)-Sr(1)-O(2W)   | 136.78(15) |
| O(1)B-Sr(1)-O(3W)  | 61.61(16)  | O(2W)C-Sr(1)-O(2W) | 82.98(15)  |
| O(4W)-Sr(1)-O(1)   | 76.31(18)  | O(3W)-Sr(1)-O(3W)B | 93.11(14)  |
| O(2)A-Sr(1)-O(1)   | 135.78(16) | O(2W)-Sr(1)-O(3W)B | 141.68(15) |
| O(1W)-Sr(1)-O(1)   | 79.0(2)    | O(1)B-Sr(1)-O(1)   | 88.99(14)  |
| 2                  |            |                    |            |
| Ba(1)-O(3)A        | 2.724(2)   | Ba(1)-O(1W)        | 2.894(2)   |
| Ba(1)-O(5)B        | 2.782(3)   | Ba(1)-O(3)         | 2.904(2)   |
| Ba(1)-O(6)C        | 2.828(2)   | Ba(1)-O(2)         | 2.938(2)   |
| Ba(1)-O(1W)C       | 2.848(2)   | Ba(1)-O(4)         | 3.054(2)   |
| Ba(1)-O(6)         | 2.872(2)   |                    |            |
| O(3)A-Ba(1)-O(5)B  | 88.69(7)   | O(5)B-Ba(1)-O(2)   | 85.43(7)   |
| O(5)B-Ba(1)-O(1W)C | 74.65(7)   | O(6)-Ba(1)-O(2)    | 126.00(6)  |
| O(5)B-Ba(1)-O(6)   | 72.62(6)   | O(1W)-Ba(1)-O(2)   | 120.97(7)  |
| O(6)C-Ba(1)-O(6)   | 123.43(6)  | O(3)-Ba(1)-O(2)    | 44.65(6)   |
| O(5)B-Ba(1)-O(1W)  | 141.12(7)  | O(5)B-Ba(1)-O(4)   | 69.06(7)   |
| O(1W)C-Ba(1)-O(1W) | 135.67(4)  | O(6)-Ba(1)-O(4)    | 52.12(6)   |
| O(6)-Ba(1)-O(1W)   | 68.73(6)   | O(1W)-Ba(1)-O(4)   | 89.98(7)   |
| O(3)A-Ba(1)-O(3)   | 132.32(5)  | O(3)-Ba(1)-O(4)    | 109.20(6)  |
| O(5)B-Ba(1)-O(3)   | 123.22(7)  | O(2)-Ba(1)-O(4)    | 74.08(7)   |
| O(6)-Ba(1)-O(3)    | 152.62(6)  | O(1W)-Ba(1)-O(3)   | 94.09(7)   |
| 3                  |            |                    |            |
| Sr(1)-O(1W)        | 2.548(5)   | Sr(1)-O(6)B        | 2.588(5)   |
| Sr(1)-O(4W)        | 2.553(5)   | Sr(1)-O(2W)        | 2.646(5)   |
| Sr(1)-O(6)         | 2.562(5)   | Sr(1)-O(3W)        | 2.660(5)   |
| Sr(1)-O(5)A        | 2.585(4)   | Sr(1)-O(3W)C       | 2.717(5)   |
| O(1W)-Sr(1)-O(4W)  | 138.99(19) | O(5)A-Sr(1)-O(2W)  | 67.07(15)  |
| O(1W)-Sr(1)-O(6)   | 74.60(16)  | O(1W)-Sr(1)-O(3W)  | 75.88(17)  |
| O(4W)-Sr(1)-O(6)   | 74.40(19)  | O(4W)-Sr(1)-O(3W)  | 143.80(18) |
| O(1W)-Sr(1)-O(5)A  | 73.08(15)  | O(6)-Sr(1)-O(3W)   | 119.02(16) |
| O(4W)-Sr(1)-O(5)A  | 123.9(2)   | O(5)A-Sr(1)-O(3W)  | 66.50(15)  |
| O(6)-Sr(1)-O(5)A   | 144.32(15) | O(6)B-Sr(1)-O(3W)  | 76.50(15)  |

|                   |           |                    |            |
|-------------------|-----------|--------------------|------------|
| O(6)-Sr(1)-O(6)B  | 73.02(17) | O(2W)-Sr(1)-O(3W)  | 132.65(16) |
| O(1W)-Sr(1)-O(2W) | 82.47(17) | O(3W)-Sr(1)-O(3W)C | 86.36(15)  |
| O(4W)-Sr(1)-O(2W) | 73.7(2)   | O(6)-Sr(1)-O(2W)   | 94.13(15)  |

---

4

|                   |            |                    |            |
|-------------------|------------|--------------------|------------|
| Ba(1)-O(5)A       | 2.700(4)   | Ba(1)-O(1W)        | 2.840(4)   |
| Ba(1)-O(3W)       | 2.779(6)   | Ba(1)-O(1W)B       | 2.853(4)   |
| Ba(1)-O(4)B       | 2.808(4)   | Ba(1)-O(2W)A       | 2.862(4)   |
| Ba(1)-O(4)        | 2.823(4)   | Ba(1)-O(2W)        | 2.871(4)   |
| Ba(1)-O(4W)       | 2.826(5)   |                    |            |
| O(5)A-Ba(1)-O(3W) | 72.70(18)  | O(4)B-Ba(1)-O(1W)B | 59.25(11)  |
| O(5)A-Ba(1)-O(4)  | 134.41(12) | O(1W)-Ba(1)-O(1W)B | 90.61(11)  |
| O(3W)-Ba(1)-O(4)  | 129.9(2)   | O(4)-Ba(1)-O(2W)A  | 77.38(11)  |
| O(4)B-Ba(1)-O(4)  | 89.36(10)  | O(5)A-Ba(1)-O(2W)  | 69.37(13)  |
| O(5)A-Ba(1)-O(4W) | 73.14(16)  | O(3W)-Ba(1)-O(2W)  | 141.67(15) |
| O(3W)-Ba(1)-O(4W) | 97.4(2)    | O(4)-Ba(1)-O(2W)   | 76.92(11)  |
| O(4)-Ba(1)-O(4W)  | 127.85(16) | O(4W)-Ba(1)-O(2W)  | 76.85(15)  |
| O(5)A-Ba(1)-O(1W) | 133.38(15) | O(1W)-Ba(1)-O(2W)  | 133.91(10) |
| O(3W)-Ba(1)-O(1W) | 72.24(18)  | O(4)-Ba(1)-O(1W)   | 59.25(11)  |

---

5

|                   |            |                   |            |
|-------------------|------------|-------------------|------------|
| Sr(1)-O(2)A       | 2.473(3)   | Sr(1)-O(1W)       | 2.571(4)   |
| Sr(1)-O(5)B       | 2.512(3)   | Sr(1)-O(4)C       | 2.591(3)   |
| Sr(1)-O(1)        | 2.513(3)   | Sr(1)-O(5)C       | 2.821(3)   |
| Sr(1)-O(4)        | 2.570(3)   | Sr(1)-O(3)        | 2.948(3)   |
| O(2)A-Sr(1)-O(5)B | 96.84(11)  | O(4)-Sr(1)-O(4)C  | 69.97(11)  |
| O(2)A-Sr(1)-O(1)  | 137.87(11) | O(1W)-Sr(1)-O(4)C | 77.79(12)  |
| O(5)B-Sr(1)-O(1)  | 85.08(11)  | O(5)B-Sr(1)-O(5)C | 75.14(10)  |
| O(2)A-Sr(1)-O(4)  | 79.66(10)  | O(4)-Sr(1)-O(5)C  | 116.03(9)  |
| O(5)B-Sr(1)-O(4)  | 163.48(11) | O(1W)-Sr(1)-O(5)C | 76.16(11)  |
| O(1)-Sr(1)-O(4)   | 86.85(11)  | O(2)A-Sr(1)-O(3)  | 80.19(9)   |
| O(2)A-Sr(1)-O(1W) | 72.77(11)  | O(5)B-Sr(1)-O(3)  | 91.91(10)  |
| O(5)B-Sr(1)-O(1W) | 86.33(13)  | O(1)-Sr(1)-O(3)   | 57.69(10)  |
| O(1)-Sr(1)-O(1W)  | 148.99(12) | O(4)-Sr(1)-O(3)   | 71.61(10)  |
| O(4)-Sr(1)-O(1W)  | 107.70(13) | O(1W)-Sr(1)-O(3)  | 152.46(10) |
| O(5)A-Sr(1)-O(4)C | 122.90(9)  |                   |            |

---

6

|                   |            |                    |            |
|-------------------|------------|--------------------|------------|
| Ba(1)-O(4)        | 2.666(3)   | Ba(1)-O(1)C        | 2.813(4)   |
| Ba(1)-O(5)A       | 2.705(4)   | Ba(1)-O(1)         | 2.742(5)   |
| Ba(1)-O(2)B       | 2.707(5)   | Ba(1)-O(2)C        | 2.947(5)   |
| Ba(1)-O(1W)       | 2.708(11)  | Ba(1)-O(3)         | 3.193(3)   |
| O(4)-Ba(1)-O(5)A  | 129.26(12) | O(1)-Ba(1)-O(1)C   | 111.79(10) |
| O(4)-Ba(1)-O(2)B  | 78.8(2)    | O(1W)-Ba(1)-O(1W') | 28.1(4)    |
| O(5)A-Ba(1)-O(2)B | 109.47(16) | O(2)B-Ba(1)-O(2)C  | 112.75(12) |
| O(4)-Ba(1)-O(1W)  | 152.3(3)   | O(1W)-Ba(1)-O(2)C  | 83.3(3)    |
| O(5)A-Ba(1)-O(1W) | 78.4(3)    | O(1)-Ba(1)-O(2)C   | 67.17(12)  |
| O(2)B-Ba(1)-O(1W) | 91.0(3)    | O(4)-Ba(1)-O(3)    | 52.66(9)   |

|                   |            |                   |           |
|-------------------|------------|-------------------|-----------|
| O(4)-Ba(1)-O(1)   | 78.46(18)  | O(5)A-Ba(1)-O(3)  | 76.68(10) |
| O(5)A-Ba(1)-O(1)  | 81.14(14)  | O(2)B-Ba(1)-O(3)  | 92.84(15) |
| O(2)B-Ba(1)-O(1)  | 156.59(14) | O(1W)-Ba(1)-O(3)  | 154.7(3)  |
| O(1W)-Ba(1)-O(1)  | 111.8(3)   | O(1)-Ba(1)-O(3)   | 68.77(12) |
| O(4)-Ba(1)-O(1)C  | 80.50(14)  | O(1W)-Ba(1)-O(1)C | 71.8(3)   |
| O(2)B-Ba(1)-O(1)C | 69.59(13)  |                   |           |

Symmetry transformations used to generate equivalent atoms in **1**: A  $x-1, y, z$ ; B  $-x+1, -y+1, -z$ ; C  $-x, -y+1, -z$ ; in **2**: A  $-x, y-1/2, -z+1/2$ ; B  $-x, -y+1, -z$ ; C  $-x, y+1/2, -z+1/2$ ; in **3**: A  $x-1, y, z$ ; B  $-x+1, -y+1, -z+1$ ; C  $-x, -y+1, -z+1$ ; in **4**: A  $-x+1, -y+1, -z$ ; B  $-x+2, -y+1, -z$ ; in **5**: A  $x-1, y, z$ ; B  $x, y-1, z$ ; C  $-x+2, -y+1, -z$ ; in **6**: A  $x+1, y, z$ ; B  $x, y-1, z$ ; C  $-x, y-1/2, -z+1$ .

Table S2. Bond lengths (Å) and angles (°) of hydrogen-bond for **1-6**.

| D-H...A      | $d(D-H)$ | $d(H...A)$ | $d(D...A)$ | $\angle DHA$ |
|--------------|----------|------------|------------|--------------|
| <b>1</b>     |          |            |            |              |
| O1W-         | 0.96     | 2.16       | 3.054(10)  | 155          |
| O2W-         | 0.97     | 1.97       | 2.892(7)   | 158          |
| O2W-         | 0.97     | 1.95       | 2.867(7)   | 157          |
| O3W-         | 0.97     | 1.87       | 2.793(8)   | 158          |
| O3W-         | 0.97     | 1.95       | 2.901(8)   | 166          |
| O4W-         | 0.96     | 2.08       | 2.947(8)   | 150          |
| O4W-         | 0.96     | 1.99       | 2.877(8)   | 153          |
| <b>2</b>     |          |            |            |              |
| O1W-         | 0.97     | 1.88       | 2.751(3)   | 148          |
| O1W-         | 0.97     | 1.89       | 2.817(3)   | 160          |
| O2W-         | 0.85     | 2.79       | 3.0474(3)  | 138          |
| O2W-         | 0.93     | 2.15       | 2.713(3)   | 118          |
| <b>3</b>     |          |            |            |              |
| O1W-         | 0.96     | 1.85       | 2.753(7)   | 155          |
| O1W-         | 0.96     | 2.53       | 2.991(7)   | 109          |
| O1W-         | 0.96     | 2.27       | 3.205(7)   | 166          |
| O2W-         | 0.96     | 2.53       | 3.152(7)   | 122          |
| O2W-         | 0.96     | 2.04       | 2.938(7)   | 155          |
| O3W-         | 0.97     | 1.96       | 2.928(6)   | 172          |
| O3W-         | 0.97     | 2.02       | 2.776(6)   | 134          |
| O4W-         | 0.96     | 2.02       | 2.966(9)   | 168          |
| O4W-HWB...O3 | 0.96     | 2.19       | 2.823(8)   | 123          |
| <b>4</b>     |          |            |            |              |
| O1W-         | 0.85     | 2.04       | 2.820(6)   | 152          |
| O1W-         | 0.85     | 2.10       | 2.841(6)   | 145          |
| O2W-         | 0.85     | 1.97       | 2.780(6)   | 160          |
| O2W-         | 0.85     | 2.03       | 2.842(6)   | 160          |
| O3W-         | 0.96     | 2.10       | 2.984(8)   | 152          |
| O3W-         | 0.96     | 2.24       | 2.92(2)    | 127          |
| O3W-         | 0.96     | 1.73       | 2.587(17)  | 146          |
| O4W-         | 0.85     | 2.30       | 2.843(7)   | 122          |

|                |      |      |          |     |  |
|----------------|------|------|----------|-----|--|
|                |      |      | 5        |     |  |
| O1W-           | 0.96 | 1.98 | 2.861(5) | 151 |  |
| O1W-           | 0.96 | 2.34 | 3.192(6) | 147 |  |
|                |      |      | 6        |     |  |
| Cl15-H15B...O5 | 0.97 | 2.46 | 3.347(8) | 152 |  |

Table S3. Thermal decomposition data of the complexes 1-6.

| Complex | Stage | Weight loss process                                               | Temperature Range/(°C) | Weight loss rate/% |       | Final solid products |       |
|---------|-------|-------------------------------------------------------------------|------------------------|--------------------|-------|----------------------|-------|
|         |       |                                                                   |                        | Found              | calcd | Found                | calcd |
| 1       | I     | (H <sub>2</sub> O) <sub>4</sub>                                   | 25.00~175.73           | 13.57              | 13.56 | SrO                  |       |
|         | II    | collapse                                                          | 175.73~379.10          | 66.93              | 66.92 | 19.50                | 19.52 |
|         | III   | collapse                                                          | 379.10~648.07          |                    |       |                      |       |
| 2       | I     | (H <sub>2</sub> O) H <sub>2</sub> O                               | 25.00~177.25           | 6.59               | 6.61  | BaO                  |       |
|         | II    | collapse                                                          | 177.25~359.14          | 65.24              | 65.23 | 28.17                | 28.16 |
|         | III   | collapse                                                          | 359.14~668.67          |                    |       |                      |       |
| 3       | I     | (H <sub>2</sub> O) <sub>4</sub>                                   | 25.00~181.35           | 13.55              | 13.56 | SrO                  |       |
|         | II    | collapse                                                          | 181.35~375.82          | 66.94              | 66.92 | 19.51                | 19.52 |
|         | III   | collapse                                                          | 375.80~657.44          |                    |       |                      |       |
| 4       | I     | [(H <sub>2</sub> O) <sub>4</sub> ] <sub>2</sub> ·H <sub>2</sub> O | 25.00~198.76           | 15.25              | 15.27 | BaO                  |       |
|         | II    | collapse                                                          | 198.76~340.43          | 58.70              | 58.72 | 26.05                | 26.01 |
|         | III   | collapse                                                          | 340.43~620.51          |                    |       |                      |       |
| 5       | I     | (H <sub>2</sub> O)                                                | 25.00~148.26           | 3.77               | 3.78  | SrO                  |       |
|         | II    | collapse                                                          | 148.26~347.45          | 74.51              | 74.49 | 21.72                | 21.73 |
|         | III   | collapse                                                          | 347.45~738.80          |                    |       |                      |       |
| 6       | I     | (H <sub>2</sub> O)                                                | 25.00~153.87           | 3.43               | 3.42  | BaO                  |       |
|         | II    | collapse                                                          | 153.87~369.42          | 67.45              | 67.46 | 29.12                | 29.12 |
|         | III   | collapse                                                          | 369.42~672.41          |                    |       |                      |       |
